# Supplementary material for: Shear stress activates ADAM10 sheddase to regulate Notch1 via the Piezo1 force sensor in endothelial cells
Source: eLife. 2020 Jun 2;9:e50684. doi: 10.7554/eLife.50684 (PMC7295575; doi:10.7554/eLife.50684)
Supplement: Figure 1—figure supplement 2—source data 1. [file elife-50684-fig1-figsupp2-data1.xlsx]

## Sheet: Fig S1-a
		Piezo1 expression (normalized to GAPDH expression - relative to siCtrl DMSO)				Statistical analysis
siCtrl	DMSO	1.00615	0.84607	1.14778		2-way Anova
	Yoda	1.25266	1.05336	0.74394
siPiezo	DMSO	0.10013	0.19345	0.11266		Tukey's multiple comparisons test	Mean Diff.	95.00% CI of diff.	Significant?	Summary	Adjusted P Value
	Yoda	0.15877	0.23734	0.16267		siCtrl:DMSO vs. siCtrl:Yoda1	-0.01665	-0.4154 to 0.3821	No	ns	0.9991
						siCtrl:DMSO vs. siPiezo1:DMSO	0.8646	0.4659 to 1.263	Yes	***	0.0005
						siCtrl:Yoda1 vs. siPiezo1:Yoda1	0.8304	0.4317 to 1.229	Yes	***	0.0007
						siPiezo1:DMSO vs. siPiezo1:Yoda1	-0.05085	-0.4496 to 0.3479	No	ns	0.9755

## Sheet: Fig S1-c
RAW					NORMALIZED
						Norm of controls	Norm to siCtrl
		VEGFR2	GAPDH		VEGFR2/GAPDH	average=
						0.527068
n1	siCtrl	2570.33	4955.86		0.518644	0.984016			Unpaired t test
	siPiezo	2127.33	5019.4		0.423821		0.817172		P value	0.7815
n2	siCtrl	2785.67	4223.69		0.659534	1.25133			P value summary	ns
	siPiezo	2612.84	4553.35		0.573829		0.870051		Significantly different (P < 0.05)?	No
n3	siCtrl	1787.06	4434.1		0.403027	0.764657			One- or two-tailed P value?	Two-tailed
	siPiezo	2361.77	5067.66		0.466047		1.15637		t, df	t=0.2966, df=4
									How big is the difference?
									Mean of column A	1
									Mean of column B	0.9479
									Difference between means (B - A) ± SEM	-0.05214 ± 0.1758
									95% confidence interval	-0.5402 to 0.4359
									R squared (eta squared)	0.02152

## Sheet: Fig S1-d
RAW					NORMALIZED
						Norm of controls	Norm to siCtrl
		PECAM-1	GAPDH		PECAM1/GAPDH	average=
						2.47561
n1	siCtrl	11987	4955.86		2.41874	0.977028			Unpaired t test
	siPiezo	12856.7	5019.4		2.56141		1.05898		P value	0.5735
n2	siCtrl	11042.9	4223.69		2.61452	1.05611			P value summary	ns
	siPiezo	11694.8	4553.35		2.56839		0.982354		Significantly different (P < 0.05)?	No
n3	siCtrl	10613.3	4434.1		2.39357	0.96686			One- or two-tailed P value?	Two-tailed
	siPiezo	9927.64	5067.66		1.95902		0.81845		t, df	t=0.6122, df=4
									How big is the difference?
									Mean of column A	1
									Mean of column B	0.9533
									Difference between means (B - A) ± SEM	-0.04674 ± 0.07635
									95% confidence interval	-0.2587 to 0.1652
									R squared (eta squared)	0.08567

## Sheet: FigS1-f
	Amplitude calcium entry				Normalized Amplitude
	siCtrl	siPiezo+Yoda			siCtrl	siPiezo+Yoda
N1	0.596	0.1619		N1	120.089	27.1644
N2	0.372	0.08849		N2	74.9547	23.7876			Unpaired t test
N3	0.5209	0.1236		N3	104.957	23.7282			P value	0.0049
									P value summary	**
	0.4963								Significantly different (P < 0.05)?	Yes
									One- or two-tailed P value?	Two-tailed
									t, df	t=5.642, df=4
									How big is the difference?
									Mean of column A	100
									Mean of column B	24.89
									Difference between means (B - A) ± SEM	-75.11 ± 13.31
									95% confidence interval	-112.1 to -38.15
									R squared (eta squared)	0.8884
