# Supplementary material for: Shear stress activates ADAM10 sheddase to regulate Notch1 via the Piezo1 force sensor in endothelial cells
Source: eLife. 2020 Jun 2;9:e50684. doi: 10.7554/eLife.50684 (PMC7295575; doi:10.7554/eLife.50684)
Supplement: Figure 1—figure supplement 4—source data 1. [file elife-50684-fig1-figsupp4-data1.xlsx]

## Sheet: FigS2-b
RAW						NORMALIZED				Statistical analysis
							Norm of controls	Norm to DMSO DMSO
			NICD	GAPDH		NICD/GAPDH	average=			2-way Anova
							0.0960955
n1	DMSO	DMSO	1149.17	11609		0.0989896	1.03012			Tukey's multiple comparisons test	Mean Diff.	95.00% CI of diff.	Significant?	Summary	Adjusted P Value
		Yoda	2947.24	13138.2		0.224325		2.26615		DMSO:DMSO vs. DMSO:Yoda	-1.384	-2.172 to -0.5961	Yes	**	0.0022
	DAPT	DMSO	122.168	15599.7		0.00783138		0.0791131		DMSO:DMSO vs. DAPT:DMSO	0.9357	0.1477 to 1.724	Yes	*	0.0217
		Yoda	90.0105	14444.1		0.00623163		0.0629524		DMSO:Yoda vs. DAPT:Yoda	2.296	1.508 to 3.084	Yes	****	<0.0001
										DAPT:DMSO vs. DAPT:Yoda	-0.02402	-0.8120 to 0.7640	No	ns	0.9996
n2	DMSO	DMSO	1087.84	10375.4		0.104848	1.09108
		Yoda	2062.85	10525		0.195995		1.86933
	DAPT	DMSO	19.341	15699.3		0.00123196		0.01175
		Yoda	10.4875	17569.3		0.00059692		0.00569321
n3	DMSO	DMSO	776.79	9198.32		0.0844491	0.878804
		Yoda	2652.64	10412		0.254769		3.01683
	DAPT	DMSO	105.435	12249.2		0.00860747		0.101925
		Yoda	203.092	12256.8		0.0165698		0.19621

## Sheet: FigS2-d
	Area Under Curve				Normalized Amplitude
	Veh+ Yoda	DAPT+Yoda			Veh+ Yoda	DAPT+Yoda
N1	587.895	413.981		N1	100	70.4175
N2	558.5	416.8		N2	95	74.6285			Unpaired t test
N3	617.289	393.502		N3	105	63.7467			P value	0.0021
									P value summary	**
	587.895								Significantly different (P < 0.05)?	Yes
									One- or two-tailed P value?	Two-tailed
									t, df	t=7.094, df=4
									How big is the difference?
									Mean of column A	100
									Mean of column B	69.6
									Difference between means (B - A) ± SEM	-30.40 ± 4.286
									95% confidence interval	-42.30 to -18.50
									R squared (eta squared)	0.9264
