# Supplementary material for: Shear stress activates ADAM10 sheddase to regulate Notch1 via the Piezo1 force sensor in endothelial cells
Source: eLife. 2020 Jun 2;9:e50684. doi: 10.7554/eLife.50684 (PMC7295575; doi:10.7554/eLife.50684)
Supplement: Figure 1—source data 1. [file elife-50684-fig1-data1.xlsx]

## Sheet: Fig 1-b
RAW						NORMALIZED				Statistical analysis
							Norm of controls	Norm to siCtrl Static
			NICD	GAPDH		NICD/GAPDH	average=			2-way Anova
							0.343625	0.198519
n1	siCtrl	Static	9331.72	26454.4		0.352747	1.02655			Tukey's multiple comparisons test	Mean Diff.	95.00% CI of diff.	Significant?	Summary	Adjusted P Value
		Shear	23805.2	33729.4		0.705769		2.00078		siCtrl:Static vs. siCtrl:Shear	-1.124	-1.905 to -0.3432	Yes	**	0.004
	siPiezo1	DMSO	1397.58	35142.5		0.0397688		0.11274		siCtrl:Static vs. siPiezo1:Static	0.4202	-0.3604 to 1.201	No	ns	0.4382
		Shear	8085.21	30235.5		0.267408		0.758073		siCtrl:Shear vs. siPiezo1:Shear	1.051	0.2700 to 1.831	Yes	**	0.0069
										siPiezo1:Static vs. siPiezo1:Shear	-0.4934	-1.274 to 0.2872	No	ns	0.3054
n2	siCtrl	Static	9779.26	27021.5		0.361907	1.0532
		Shear	15730.4	24313.9		0.64697		1.78767
	siPiezo1	DMSO	7331.39	32611.4		0.22481		0.621182
		Shear	11141.5	25598.4		0.435242		1.20264
n3	siCtrl	Static	5668.19	16768.6		0.338024	0.983702
		Shear	8832.68	16172.7		0.546148		1.61571
	siPiezo1	DMSO	4528.92	9314.73		0.486211		1.43839
		Shear	8241.8	13526.6		0.609306		1.80255
n4	siCtrl	Static	5767.82	17301.9		0.333364	0.970141
		Shear	17140.2	19834.2		0.864171		2.59227
	siPiezo1	DMSO	2442.79	17188.8		0.142115		0.426306
		Shear	2772.86	18950.7		0.14632		0.438919
n5	siCtrl	Static	4480.39	13491.9		0.332081	0.966405
		Shear	11709	13442.1		0.871075		2.62308
	siPiezo1	DMSO	1110.75	11142.1		0.099689		0.300195
		Shear	4610.02	11927.6		0.3865		1.16387
							Inter-experiment variation

## Sheet: Fig 1-d
RAW						NORMALIZED				Statistical analysis
							Norm of controls	Norm to siCtrl DMSO
			NICD	GAPDH		NICD/GAPDH	average=			2-way Anova
							0.371503
n1	siCtrl	DMSO	4041.22	9302		0.434447	1.16943			Tukey's multiple comparisons test	Mean Diff.	95.00% CI of diff.	Significant?	Summary	Adjusted P Value
		Yoda	5045	8500.63		0.593485		1.36607		siCtrl:DMSO vs. siCtrl:Yoda	-0.5593	-1.033 to -0.08598	Yes	*	0.0223
	siPiezo1	DMSO	1811.79	10432.1		0.173675		0.399761		siCtrl:DMSO vs. siPiezo:DMSO	0.4794	0.006120 to 0.9527	Yes	*	0.0472
		Yoda	2962.91	9302		0.318524		0.733172		siCtrl:Yoda vs. siPiezo:Yoda	0.7308	0.2575 to 1.204	Yes	**	0.0049
										siPiezo:DMSO vs. siPiezo:Yoda	-0.3079	-0.7812 to 0.1654	No	ns	0.2369
n2	siCtrl	DMSO	2582.86	7935.07		0.325499	0.876168
		Yoda	4613.86	8051.58		0.573038		1.76049
	siPiezo1	DMSO	1044.89	7631.4		0.13692		0.420646
		Yoda	2497.03	7403.76		0.337265		1.03615
n3	siCtrl	DMSO	3286.2	9268.3		0.354563	0.954401
		Yoda	4553.85	8279.25		0.550032		1.5513
	siPiezo1	DMSO	2304.5	8767.64		0.262841		0.74131
		Yoda	2124.33	8366.4		0.253912		0.716125
							Inter-experiment variation
