# Supplementary material for: Shear stress activates ADAM10 sheddase to regulate Notch1 via the Piezo1 force sensor in endothelial cells
Source: eLife. 2020 Jun 2;9:e50684. doi: 10.7554/eLife.50684 (PMC7295575; doi:10.7554/eLife.50684)
Supplement: Figure 2—figure supplement 2—source data 1. [file elife-50684-fig2-figsupp2-data1.xlsx]

## Sheet: Fig S3-a
		Piezo1 expression (normalized to GAPDH expression - relative to siCtrl DMSO)				Statistical analysis
siCtrl	DMSO	1.183	0.743	1.074		2-way Anova
	Yoda	1.24986	0.885768	1.04247
siADAM10	DMSO	0.039418	0.103479	0.0688691		Tukey's multiple comparisons test	Mean Diff.	95.00% CI of diff.	Significant?	Summary	Adjusted P Value
	Yoda	0.0700729	0.129576	0.0643941		siCtrl:DMSO vs. siCtrl:Yoda	-0.05936	-0,4476 to 0,3289	No	ns	0.9592
						siCtrl:DMSO vs. siADAM10:DMSO	0.9294	0,5412 to 1,318	Yes	***	0.0003
						siCtrl:Yoda vs. siADAM10:Yoda	0.9714	0,5831 to 1,360	Yes	***	0.0002
						siADAM10:DMSO vs. siADAM10:Yoda	-0.01743	-0,4057 to 0,3708	No	ns	0.9988

## Sheet: FigS3-c
RAW						NORMALIZED				Statistical analysis
							Norm of controls	Norm to DMSO DMSO
			Inactive ADAM-10 (95kDA)	GAPDH		Inactive ADAM10/GAPDH	average=			2-way Anova
							0.275308
n1	siCtrl	DMSO	1144.89	4636.93		0.246907	0.89684			Tukey's multiple comparisons test	Mean Diff.	95.00% CI of diff.	Significant?	Summary	Adjusted P Value
		Yoda	1052.77	5057.18		0.208174		0.843125		siCtrl:DMSO vs. siCtrl:Yoda1	0.07866	-0,2402 to 0,3975	No	ns	0.8571
	siADAM10	DMSO	124.263	5308.81		0.0234069		0.0948006		siCtrl:DMSO vs. siADAM10:DMSO	0.8647	0,5459 to 1,184	Yes	***	0.0001
		Yoda	366.627	4797.74		0.0764166		0.309496		siCtrl:Yoda1 vs. siADAM10:Yoda1	0.6515	0,3327 to 0,9703	Yes	***	0.0008
										siADAM10:DMSO vs. siADAM10:Yoda1	-0.1346	-0,4534 to 0,1842	No	ns	0.5591
n2	siCtrl	DMSO	1134.89	4154.99		0.27314	0.992124
		Yoda	876.698	3198.78		0.274073		1.00342
	siADAM10	DMSO	210.799	3405.09		0.061907		0.22665
		Yoda	105.456	3415.85		0.0308725		0.113028
n3	siCtrl	DMSO	1596.49	5219.39		0.305877	1.11104
		Yoda	1466.56	5225.81		0.280637		0.917484
	siADAM10	DMSO	146.54	5681.45		0.0257926		0.0843235
		Yoda	125.053	6242.63		0.0200322		0.0654909

## Sheet: FigS3-d
RAW						NORMALIZED				Statistical analysis
							Norm of controls	Norm to DMSO DMSO
			85 kDA band	GAPDH		85 kDa band	average=			2-way Anova
							0.189621
n1	siCtrl	DMSO	878.234	4636.93		0.1894	0.998836			Tukey's multiple comparisons test	Mean Diff.	95.00% CI of diff.	Significant?	Summary	Adjusted P Value
		Yoda	884.577	5057.18		0.174915		0.923524		siCtrl:DMSO vs. siCtrl:Yoda	-0.164	-0,8482 to 0,5202	No	ns	0.8669
	siADAM10	DMSO	919.577	5308.81		0.173217		0.914558		siCtrl:DMSO vs. siADAM10:DMSO	0.08059	-0,6036 to 0,7648	No	ns	0.9804
		Yoda	680.991	4797.74		0.14194		0.74942		siCtrl:Yoda vs. siADAM10:Yoda	0.02291	-0,6613 to 0,7071	No	ns	0.9995
										siADAM10:DMSO vs. siADAM10:Yoda	-0.2216	-0,9058 to 0,4625	No	ns	0.7337
n2	siCtrl	DMSO	793.113	4154.99		0.190882	1.00665
		Yoda	861.82	3198.78		0.269422		1.41145
	siADAM10	DMSO	715.406	3405.09		0.210099		1.10067
		Yoda	1040.77	3415.85		0.304688		1.59621
n3	siCtrl	DMSO	984.27	5219.39		0.188579	0.99451
		Yoda	1140.12	5225.81		0.218171		1.15692
	siADAM10	DMSO	796.061	5681.45		0.140116		0.743007
		Yoda	1268.52	6242.63		0.203202		1.07754

## Sheet: FigS3-f
	Amplitude calcium entry				Normalized Amplitude
	siCtrl + Yoda1	siADAM10+Yoda1			siCtrl + Yoda1	siPiezo+Yoda			Unpaired t test
N1	0.3453	0.5272		N1	95.4395	152.679			P value	< 0,0001
N2	0.3721	0.5907		N2	102.847	158.748			P value summary	****
N3	0.368	0.5936		N3	101.714	161.304			Significantly different? (P < 0.05)	Yes
									One- or two-tailed P value?	Two-tailed
	0.3618								t, df	t=16,73 df=4
									How big is the difference?
									Mean ± SEM of column A	100,0 ± 2,304, n=3
									Mean ± SEM of column B	157,6 ± 2,558, n=3
									Difference between means	57,58 ± 3,442
									95% confidence interval	48,02 to 67,13
									R squared	0.9859

## Sheet: FigS3-h
	Area under the curve				Normalized Amplitude
	DMSO + Yoda1	GI + Yoda1			siCtrl	siPiezo+Yoda1			Unpaired t test
N1	561.773	505.596		N1	100.586	90			P value	0.6234
N2	532.503	516.527		N2	95.3452	97			P value summary	ns
N3	581.224	610.285		N3	104.069	105			Significantly different? (P < 0.05)	No
									One- or two-tailed P value?	Two-tailed
	558.5								t, df	t=0,5312 df=4
									How big is the difference?
									Mean ± SEM of column A	100,0 ± 2,535, n=3
									Mean ± SEM of column B	97,33 ± 4,333, n=3
									Difference between means	-2,667 ± 5,020
									95% confidence interval	-16,61 to 11,27
									R squared	0.06588

## Sheet: FigS3_j
RAW						NORMALIZED				Statistical analysis
							Norm of controls	Norm to DMSO DMSO
			NICD	GAPDH		NICD/GAPDH	average=			2-way Anova
							0.560629
n1	DMSO	DMSO	17957.9	30954.9		0.580132	1.03479			Tukey's multiple comparisons test	Mean Diff.	95.00% CI of diff.	Significant?	Summary	Adjusted P Value
		Yoda	22840.6	30460.8		0.749838		1.29253		DMSO:DMSO vs. DMSO:Yoda	-0.4085	-0,6926 to -0,1245	Yes	**	0.0075
	GI 0,5	DMSO	10536.9	33695.4		0.312709		0.539031		DMSO:DMSO vs. GI 0,5:DMSO	0	-0,2840 to 0,2840	No	ns	> 0,9999
		Yoda	9835.92	34723.1		0.283267		0.488281		DMSO:Yoda vs. GI 0,5:Yoda	0.802	0,5179 to 1,086	Yes	****	< 0,0001
										GI 0,5:DMSO vs. GI 0,5:Yoda	0.3934	0,1094 to 0,6775	Yes	**	0.0094
n2	DMSO	DMSO	16961	32743.4		0.517997	0.923956
		Yoda	24670.7	30064.3		0.820599		1.58418
	GI 0,5	DMSO	11053.7	31792.6		0.347683		0.671206
		Yoda	10018.6	32136		0.311757		0.601851
n3	DMSO	DMSO	14443.1	24741.5		0.583759	1.04126
		Yoda	18911.3	24016		0.787448		1.34893
	GI 0,5	DMSO	10621.4	23282.6		0.456194		0.781477
		Yoda	14080.4	33059.4		0.425913		0.729604

## Sheet: FigS3-k
						Statistical analysis
			Max-Min	Average of siCtrl Static		2-way Anova
				1200.54
n1	DMSO	DMSO	1454.08	1.21119		Tukey's multiple comparisons test	Mean Diff.	95.00% CI of diff.	Significant?	Summary	Adjusted P Value
		Yoda1	2017.75	1.6807		DMSO:DMSO vs. DMSO:Yoda1	-0.615	-1,157 to -0,07258	Yes	*	0.0275
	Gadolinium	DMSO	2023.95	1.68586		DMSO:DMSO vs. Gd3+:DMSO	-0.4165	-0,9589 to 0,1260	No	ns	0.1423
		Yoda1	1385.34	1.15393		DMSO:Yoda1 vs. Gd3+:Yoda1	0.3235	-0,2189 to 0,8660	No	ns	0.2963
						Gd3+:DMSO vs. Gd3+:Yoda1	0.125	-0,4175 to 0,6674	No	ns	0.8793
n2	DMSO	DMSO	1272.6	1.06002
		Yoda1	2091.41	1.74205
	Gadolinium	DMSO	1608.9	1.34014
		Yoda1	1670.17	1.39118
n3	DMSO	DMSO	874.943	0.728789
		Yoda1	1673.53	1.39398
	Gadolinium	DMSO	1434.79	1.19512
		Yoda1	1561.99	1.30107
				Inter-experiment variation
