# Supplementary material for: Shear stress activates ADAM10 sheddase to regulate Notch1 via the Piezo1 force sensor in endothelial cells
Source: eLife. 2020 Jun 2;9:e50684. doi: 10.7554/eLife.50684 (PMC7295575; doi:10.7554/eLife.50684)
Supplement: Figure 2—source data 1. [file elife-50684-fig2-data1.xlsx]

## Sheet: Fig 2-a
	RAW Flexstation Data- 520nm emission fluorescence intensity																			Statistical analysis
	N1				N2				N3
	siCtrl		siPiezo1		siCtrl		siPiezo1		siCtrl		siPiezo1						Max-Min	Average of siCtrl Static		2-way Anova
Time (hh:mm:ss)	Static	Shear	Static	Shear	Static	Shear	Static	Shear	Static	Shear	Static	Shear						1980.75
00:00:00	617.773	719.95	588.374	542.949	567.742	596.699	539.542	575.085	568.112	626.589	549.773	556.109		n1	siCtrl	Static	2443.5	1.23362		Tukey's multiple comparisons test	Mean Diff.	95.00% CI of diff.	Significant?	Summary	Adjusted P Value
00:02:30	719	885.585	700.992	676.343	775.905	839.482	752.31	724.685	754.392	742.103	634.156	530.951				Shear	3815.43	1.92625		siCtrl:Static vs. siCtrl:Shear	-0.8885	-1.511 to -0.2666	Yes	**	0.0079
00:05:00	813.559	1038.93	808.85	783.464	865.94	999.872	838.89	860.5	787.113	897.037	726.111	555.291			siPiezo	Static	2668.9	1.34742		siCtrl:Static vs. siPiezo:Static	-0.1613	-0.7832 to 0.4607	No	ns	0.8389
00:07:30	905.875	1198.57	924.162	891.271	942.744	1151.68	920.869	978.299	830.366	1056.74	823.799	576.615				Shear	2532.63	1.27862		siCtrl:Shear vs. siPiezo:Shear	0.7062	0.08427 to 1.328	Yes	*	0.0273
00:10:00	1019.88	1359.41	1046.34	993.65	1053.35	1308.91	969.621	1091.93	902.842	1243.07	920.974	613.465								siPiezo:Static vs. siPiezo:Shear	-0.02102	-0.6430 to 0.6010	No	ns	0.9995
00:12:30	1121.33	1530.42	1147.05	1113.14	1113.81	1478.12	1044.13	1231.98	953.048	1382.97	1017.14	631.059		n2	siCtrl	Static	2056.85	1.03842
00:15:00	1222.56	1701.27	1274.84	1219.84	1221.59	1653.72	1097.07	1339.77	1010.99	1555.42	1111.97	671.747				Shear	3824.01	1.93059
00:17:30	1319.11	1856.2	1374.71	1331.1	1289.19	1800.42	1209.32	1480.46	1066.51	1694.8	1206.54	684.184			siPiezo	Static	2031.68	1.02571
00:20:00	1429.13	2026.19	1504.98	1432.31	1373.87	1990.88	1252.05	1597.85	1137.46	1878.56	1310.26	729.983				Shear	2937.63	1.48309
00:22:30	1525.46	2177.12	1604.17	1532.74	1447.27	2144.67	1332.83	1703.28	1171.65	2013.77	1393.08	755.353
00:25:00	1631.12	2345.41	1709.37	1636.32	1516.33	2294.34	1441.32	1845.88	1239.61	2160.72	1484.69	764.823		n3	siCtrl	Static	1441.9	0.727955
00:27:30	1718.49	2509.01	1818.37	1735.73	1601.41	2456.14	1500.59	1950.01	1282.4	2303.87	1576.52	795.349				Shear	3582.72	1.80877
00:30:00	1837.75	2672.74	1937.68	1849.63	1676.82	2629.86	1581.91	2069.22	1335.17	2479.1	1669.72	835.342			siPiezo	Static	2199.95	1.11067
00:32:30	1930.49	2831.22	2040.41	1945.78	1753.59	2785.84	1686.25	2206.12	1393.7	2600.5	1755.54	835.87				Shear	1555.21	0.785163
00:35:00	2047.82	3003.89	2169.93	2069.03	1837.37	2960.59	1749.06	2317.42	1461.78	2789.11	1857.29	879.631
00:37:30	2142.94	3155.8	2272.99	2155.18	1913.08	3097.31	1829.97	2445.84	1512.59	2922.59	1940.41	883.634						Inter-experiment variation
00:40:00	2256.73	3336.5	2397.22	2288.98	2008.91	3274.18	1922.76	2564.24	1566.28	3097.19	2046.75	927.574
00:42:30	2359.76	3481.53	2497.07	2379.53	2065.61	3421.14	1986.03	2678.19	1623.74	3239.28	2116.22	944.676
00:45:00	2457.37	3631.94	2618.65	2475.92	2152.38	3553.78	2074.38	2796.51	1662.9	3376.44	2218.29	962.407
00:47:30	2557.59	3791.56	2731.4	2581	2222.05	3720.26	2151.91	2923.69	1739.2	3529.1	2297.63	982.506
00:50:00	2673.63	3939.36	2837.63	2676.57	2307.31	3859.97	2233.45	3032.4	1780.63	3673.57	2394.84	1006.25
00:52:30	2760.04	4085.58	2932.53	2783.63	2366.48	3983.37	2300.63	3141.17	1831.8	3819.83	2473.88	1029.05
00:55:00	2880.69	4250.95	3034.87	2885.81	2463.03	4134.37	2394.66	3272.43	1901.89	3959.02	2575.18	1042.18
00:57:30	2961.13	4397.09	3155.3	2989.77	2526.03	4279.27	2465.89	3392.54	1956.74	4112.36	2648.85	1069.87
01:00:00	3061.28	4535.38	3257.28	3075.58	2624.59	4420.7	2571.23	3512.72	2010.01	4209.31	2749.73	2086.16
Max	3061.28	4535.38	3257.28	3075.58	2624.59	4420.7	2571.23	3512.72	2010.01	4209.31	2749.73	2086.16
Min	617.773	719.95	588.374	542.949	567.742	596.699	539.542	575.085	568.112	626.589	549.773	530.951
Max-Min	2443.5	3815.43	2668.9	2532.63	2056.85	3824.01	2031.68	2937.63	1441.9	3582.72	2199.95	1555.21

## Sheet: Fig 2-b
	RAW Flexstation Data- 520nm emission fluorescence intensity																											Statistical analysis
	N1								N2				N3				N4
	DMSO				GI				DMSO		GI		DMSO		GI		DMSO		GI						Max-Min	Average of DMSO DMSO		2-way Anova
Time (hh:mm:ss)	DMSO		Yoda		DMSO		Yoda		DMSO	Yoda	DMSO	Yoda	DMSO	Yoda	DMSO	Yoda	DMSO	Yoda	DMSO	Yoda						2046.68
00:00:00	53849.3	51951.4	51876.8	51609.5	53285.1	56430.3	55428.7	57104.7	39145.4	35440.5	40876.5	35148	39459.8	33764	39453.1	35719.3	39589.1	31334.5	40078.8	36709.4		n1	DMSO	DMSO	2357.28	1.15176		Tukey's multiple comparisons test	Mean Diff.	95.00% CI of diff.	Significant?	Summary	Adjusted P Value
00:02:30	54736.4	52958.3	52937.7	52841.1	54107.7	57393.6	56156.7	57593.5	40008.1	36995.7	41219.8	36204.5	39920	34875.8	40048.2	36301	40457.8	32401.2	41033.9	38137.3				Yoda	3800.47	1.8569		DMSO:DMSO vs. DMSO:Yoda1	-0.639	-1.038 to -0.2396	Yes	**	0.0023
00:05:00	54928.9	53371.2	53474.8	53441.7	54596.1	57783.9	56264	57769.7	39742.3	37569.8	40781.4	36046.7	39728.9	35205.2	40215	36142	40191.6	32864.6	40730.3	38146.1			GI	DMSO	1989.54	0.972081		DMSO:DMSO vs. GI:DMSO	-0.02104	-0.4204 to 0.3783	No	ns	0.9986
00:07:30	55125.1	53512.1	53767.5	53651.6	54446.7	57636.6	56427.1	57960.5	39871.6	38159.6	41080.6	36096.1	40059.6	35841.6	40283.7	36529.6	40309.5	33361.3	40979.2	38326.4				Yoda	1760.36	0.860107		DMSO:Yoda1 vs. GI:Yoda1	0.717	0.3177 to 1.116	Yes	***	0.0009
00:10:00	55398.7	53463.4	54044.8	53962.1	54687.1	57937.5	56586.9	58004.2	40550.4	38709.8	41893.4	36482.4	40475.3	36645	40965.5	36888.4	40481.4	33909.1	41493.8	38839.2								GI:DMSO vs. GI:Yoda1	0.09911	-0.3003 to 0.4985	No	ns	0.8805
00:12:30	55413.8	53727.1	54325.8	54049.2	54617.4	57725.7	56715.1	58178.1	41131.1	38966.9	42402.3	36711.2	40926.4	37102.6	41273.7	37444	40826.9	34086.8	41934.2	39059.6		n2	DMSO	DMSO	2599.11	1.26992
00:15:00	55622.1	53851.1	54681.3	54586.9	54783.5	58188.5	56727.5	58369.5	41226.8	38580.9	42474.1	36485.6	40728.3	36891.2	41181.4	37233.2	40541.8	33907.8	41697.2	38977.2				Yoda	3526.46	1.72302
00:17:30	55493.8	53705	54451.4	54343.9	54722.2	57913.6	56795.3	58215.7	40628.6	37692.2	41899	35943.6	40306.1	36104.1	40604.1	36729.1	39942.9	33320.8	41108.1	38150.5			GI	DMSO	2326.07	1.13651
00:20:00	55484.5	53923.4	54885.5	54474.5	54826.1	58221.6	56710.8	58392.3	40973.3	38047.1	42445.7	36174.4	40605.5	36258.7	41019.1	37050.3	41077.3	33485.9	41623.2	38636.7				Yoda	1563.24	0.763793
00:22:30	55967.4	54141.9	55032.2	54852.1	55085.4	58185.2	57148.9	58533.7	41172.4	38015.9	42566.1	36290.5	40702.1	36303.4	41102.8	37224.2	40442.5	33584.8	41836	38520.5
00:25:00	55830.7	54128.9	55001.1	54765	54978.4	58071.9	57020	58422.4	40878.8	37675	42207.9	35884	40239.9	35977.2	40507.4	36678.7	39849.3	33211.5	41371	38215.4		n3	DMSO	DMSO	1742.14	0.851205
00:27:30	55734.5	54151.2	55149.3	54885	55067.9	58348.2	56859.6	58429	41379.2	38037.4	42674.9	36147.5	40777.4	36331.7	41095.2	37102.3	40377.2	33578.3	41758	38709.4				Yoda	3338.61	1.63124
00:30:00	55728.1	54030.5	55088.3	54924.5	54829.5	58038.6	56764.1	58475.6	41561.1	38223.7	42939.1	36452.3	41065.7	36610.2	41400.9	37475.5	40756.3	33801.3	41993.5	38732.1			GI	DMSO	1947.84	0.951709
00:32:30	56045.3	53954.1	55188.7	54925.4	55147.1	58196	57088.7	58653.7	41378.5	37988.8	42724.5	36269	40781.3	36323.1	41041.7	37210.9	40451.3	33528	41874.9	38636.4				Yoda	1873.88	0.915572
00:35:00	55963.4	53823.1	55287.3	55078.4	55044.3	58178.4	56815.4	58589.2	41510.6	38041.9	42825	36165	40747.3	36312.7	40933.8	37326.6	40485.6	33588.1	41801.1	38671.2
00:37:30	55940.9	54035.4	55441.5	55318.1	55172.7	58324.5	56979.8	58582.3	41189.7	37798.3	42609.3	36114.7	40635.8	36332.4	40956.3	37267.7	40232.2	33582.1	41785.7	38456.2		n4	DMSO	DMSO	1488.17	0.727116
00:40:00	55967.8	54109.7	55242.3	55203.3	55028.9	58191.9	56921.4	58560.9	41744.5	38299	43107.5	36636.4	41202	36597.1	41344.1	37593.2	40557.4	33843.1	42174.3	38996.9				Yoda	2752.28	1.34476
00:42:30	55823	53828.8	55329.9	54935.7	54745.4	58142.1	56669.3	58585.7	41453.1	38078.3	42957.3	36291.9	40819.8	36455.1	40961.6	37267.8	40472.8	33760.6	41853.1	38669.9			GI	DMSO	2095.53	1.02387
00:45:00	55528.7	53752.1	55201.3	54910.2	54727.9	57749.4	56733.5	58220.1	41198.1	37679.2	42671.9	36109.3	40588.6	36148.3	40767.9	37084	40202.1	33403.4	41572.1	38499.6				Yoda	2350.13	1.14827
00:47:30	56226	54289.4	55709.8	55377.4	55232.1	58462.5	57228.8	58821.8	41627.7	38014.7	42828.8	36291.8	40806.1	36364	40935.6	37272.7	40401.4	33651.6	41907	38741.2
00:50:00	55910.8	53921	55434.6	55243.8	54921.5	58240.8	56918.9	58548.1	40914.2	37269.1	42096.9	35688.4	40204.4	35914.4	40336.8	36748.6	39821.7	33080	41094.1	38083
00:52:30	55952.8	54228.9	55606	55353.6	54974.6	58404.5	56815.2	58665.1	41499.5	37994	43020.9	36230.4	40719.8	36376.5	41116.4	37168	40400.8	33714.6	41834.3	38718.5
00:55:00	55976.1	53973.7	55447.2	55230.8	55019	58028.1	56619.5	58620.3	41002.9	37383	42281.2	35817.1	40154.9	35858.5	40392.7	36729.2	39865.6	33102.4	41194.1	38044.1
00:57:30	55715	53934.4	55187.8	55086.3	54691.2	57993.9	56746.9	58345.4	41356.9	37634.7	42637.3	35986.1	40626.6	36118.3	40765.2	37023.3	40087.5	33337.3	41531.2	38398.9
01:00:00	55891.6	54163.2	55570.6	55206.6	55071.5	58332.4	56964.6	58825.4	41411.2	37782.1	42777.7	36107	40675.8	36288.7	40831.5	37120.2	40327.1	33439.9	41799.5	38612.7
Max	56226	54289.4	55709.8	55377.4	55232.1	58462.5	57228.8	58825.4	41744.5	38966.9	43107.5	36711.2	41202	37102.6	41400.9	37593.2	41077.3	34086.8	42174.3	39059.6
Min	53849.3	51951.4	51876.8	51609.5	53285.1	56430.3	55428.7	57104.7	39145.4	35440.5	40781.4	35148	39459.8	33764	39453.1	35719.3	39589.1	31334.5	40078.8	36709.4
Max-Min	2376.64	2337.93	3833.05	3767.89	1946.92	2032.16	1800.07	1720.66	2599.11	3526.46	2326.07	1563.24	1742.14	3338.61	1947.84	1873.88	1488.17	2752.28	2095.53	2350.13
Average	2357.28		3800.47		1989.54		1760.36

## Sheet: Fig 2-d
RAW					NORMALIZED				Statistical analysis
						Norm of controls	Norm to DMSO DMSO
		Primed ADAM10 ( 62-64 kDa)	GAPDH		NICD/GAPDH	average=
						0.0119077			Unpaired t test
n1	DMSO	175.263	12332.1		0.0142119	1.19351			P value	0.0043
	Yoda	1494.96	12203.9		0.122499		8.61945		P value summary	**
									Significantly different (P < 0.05)?	Yes
n2	DMSO	82.042	8382.2		0.00978765	0.821959			One- or two-tailed P value?	Two-tailed
	Yoda	858.468	9186.12		0.0934527		9.54802		t, df	t=5.833, df=4
									How big is the difference?
n3	DMSO	107.192	9143.32		0.0117235	0.984533			Mean of column DMSO (A)	1
	Yoda	674.406	10225.5		0.0659534		5.62573		Mean of column Yoda (B)	7.931
									Difference between means (B - A) ± SEM	6.931 ± 1.188
						Inter-experiment variation			95% confidence interval	3.632 to 10.23
									R squared (eta squared)	0.8948

## Sheet: Fig 2-f
RAW						NORMALIZED				Statistical analysis
							Norm of controls	Norm to DMSO DMSO
			NICD	GAPDH		NICD/GAPDH	average of NICD/GAPDH			2-way Anova
							0.0960955
n1	DMSO	DMSO	1149.17	11609		0.0989896	1.03012			Tukey's multiple comparisons test	Mean Diff.	95.00% CI of diff.	Significant?	Summary	Adjusted P Value
		Yoda	2947.24	13138.2		0.224325		2.26615		DMSO:DMSO vs. DMSO:Yoda	-1.384	-2.283 to -0.4850	Yes	**	0.005
	GI	DMSO	99.96	13782.8		0.00725252		0.0732655		DMSO:DMSO vs. GI:DMSO	0.7895	-0.1097 to 1.689	No	ns	0.0868
		Yoda	86.753	12338.5		0.00703109		0.0710285		DMSO:Yoda vs. GI:Yoda	1.98	1.081 to 2.879	Yes	***	0.0005
										GI:DMSO vs. GI:Yoda	-0.1933	-1.092 to 0.7058	No	ns	0.8987
n2	DMSO	DMSO	1087.84	10375.4		0.104848	1.09108
		Yoda	2062.85	10525		0.195995		1.86933
	GI	DMSO	601.382	14713.8		0.040872		0.389822
		Yoda	757.43	10628.5		0.0712638		0.679687
n3	DMSO	DMSO	776.79	9198.32		0.0844491	0.878804
		Yoda	2652.64	10412		0.254769		3.01683
	GI	DMSO	188.749	13262.7		0.0142315		0.168522
		Yoda	453.062	11643.3		0.0389118		0.460772
							Inter-experiment variation

## Sheet: Fig 2-h
RAW						NORMALIZED				Statistical analysis
							Norm of controls	Norm to siCtrl DMSO
			NICD	GAPDH		NICD/GAPDH	average of NICD/GAPDH			2-way Anova
							0.117276
n1	siCtrl	DMSO	670.891	6213.64		0.107971	0.920657			Tukey's multiple comparisons test	Mean Diff.	95.00% CI of diff.	Significant?	Summary	Adjusted P Value
		Yoda	1092.03	5486.28		0.199048		1.84354		siCtrl:DMSO vs. siCtrl:Yoda	-1.118	-2.049 to -0.1867	Yes	*	0.0205
	siADAM10	DMSO	375.335	6074.26		0.0617911		0.572295		siCtrl:DMSO vs. siADAM10:DMSO	0.6022	-0.3289 to 1.533	No	ns	0.2406
		Yoda	473.335	6076.38		0.0778976		0.72147		siCtrl:Yoda vs. siADAM10:Yoda	1.436	0.5053 to 2.367	Yes	**	0.005
										siADAM10:DMSO vs. siADAM10:Yoda	-0.2837	-1.215 to 0.6474	No	ns	0.7667
n2	siCtrl	DMSO	1103.99	8937.88		0.123518	1.05323
		Yoda	3169	9687		0.327139		2.64851
	siADAM10	DMSO	572.175	9621.05		0.0594711		0.481477
		Yoda	1327.25	9351.23		0.141933		1.14908
n3	siCtrl	DMSO	1365.62	11348.2		0.120338	1.02611
		Yoda	2440.18	10893.3		0.224006		1.86147
	siADAM10	DMSO	235.435	14020.5		0.0167922		0.139541
		Yoda	282.849	13519.3		0.0209218		0.173858
							Inter-experiment variation
