# Supplementary material for: Shear stress activates ADAM10 sheddase to regulate Notch1 via the Piezo1 force sensor in endothelial cells
Source: eLife. 2020 Jun 2;9:e50684. doi: 10.7554/eLife.50684 (PMC7295575; doi:10.7554/eLife.50684)
Supplement: Figure 3—figure supplement 1—source data 1. [file elife-50684-fig3-figsupp1-data1.xlsx]

## Sheet: FigS4-a
	HEY2 expression (normalized to GAPDH expression - relative to DMSO)				Statistical analysis
	DMSO	Yoda			Unpaired t test
	0.96919	3.11634			P value	0.0907
	0.89804	4.33146			P value summary	ns
	1.13277	5.71539			Significantly different? (P < 0.05)	No
					One- or two-tailed P value?	Two-tailed
					t, df	t=2,219 df=4
					How big is the difference?
					Mean ± SEM of column A	0,9997 ± 0,2109, n=3
					Mean ± SEM of column B	3,067 ± 0,9075, n=3
					Difference between means	2,067 ± 0,9317
					95% confidence interval	-0,5194 to 4,654
					R squared	0.5518

## Sheet: FigS4-b
	HES2 expression (normalized to GAPDH expression - relative to DMSO)				Statistical analysis
	DMSO	Yoda			Unpaired t test
	1.19	0.58			P value	0.9093
	1.26	0.71			P value summary	ns
	0.56	1.58			Significantly different? (P < 0.05)	No
					One- or two-tailed P value?	Two-tailed
					t, df	t=0,1213 df=4
					How big is the difference?
					Mean ± SEM of column A	1,003 ± 0,2226, n=3
					Mean ± SEM of column B	0,9567 ± 0,3139, n=3
					Difference between means	-0,04667 ± 0,3848
					95% confidence interval	-1,115 to 1,022
					R squared	0.003663

## Sheet: FigS4-c
	Jagged1 expression (normalized to GAPDH expression - relative to DMSO)				Statistical analysis
	DMSO	Yoda			Unpaired t test
	1.06014	1.13682			P value	0.3182
	0.922906	1.40444			P value summary	ns
	1.01695	0.939523			Significantly different? (P < 0.05)	No
					One- or two-tailed P value?	Two-tailed
					t, df	t=1,139 df=4
					How big is the difference?
					Mean ± SEM of column A	1,000 ± 0,04051, n=3
					Mean ± SEM of column B	1,160 ± 0,1347, n=3
					Difference between means	0,1603 ± 0,1407
					95% confidence interval	-0,2303 to 0,5509
					R squared	0.245
