# Supplementary material for: Shear stress activates ADAM10 sheddase to regulate Notch1 via the Piezo1 force sensor in endothelial cells
Source: eLife. 2020 Jun 2;9:e50684. doi: 10.7554/eLife.50684 (PMC7295575; doi:10.7554/eLife.50684)
Supplement: Figure 3—source data 1. [file elife-50684-fig3-data1.xlsx]

## Sheet: Fig 3-a
		HES1 expression (normalized to GAPDH expression - relative to siCtrl DMSO)				Statistical analysis
siCtrl	DMSO	0.96919	0.89804	1.13277		2-way Anova
	Yoda	3.11634	4.33146	5.71539
siPiezo	DMSO	1.05691	1.11717	1.11717		Tukey's multiple comparisons test	Mean Diff.	95.00% CI of diff.	Significant?	Summary	Adjusted P Value
	Yoda	1.4239	1.46394	1.3946		siCtrl:DMSO vs. siCtrl:Yoda1	-3.388	-5.096 to -1.679	Yes	***	0.001
						siCtrl:DMSO vs. siPiezo:DMSO	-0.09708	-1.806 to 1.612	No	ns	0.9977
						siCtrl:Yoda1 vs. siPiezo:Yoda1	2.96	1.252 to 4.669	Yes	**	0.0024
						siPiezo:DMSO vs. siPiezo:Yoda1	-0.3304	-2.039 to 1.378	No	ns	0.9231

## Sheet: Fig 3-b
		DLL4 expression (normalized to GAPDH expression - relative to siCtrl DMSO)				Statistical analysis
siCtrl	DMSO	1.10492	0.84613	1.04895		2-way Anova
	Yoda	1.69813	1.73381	1.75193
siPiezo	DMSO	1.15986	0.94537	0.67546		Tukey's multiple comparisons test	Mean Diff.	95.00% CI of diff.	Significant?	Summary	Adjusted P Value
	Yoda	1.14786	0.86391	1.2388		siCtrl:DMSO vs. siCtrl:Yoda1	-0.728	-1.174 to -0.2818	Yes	**	0.0035
						siCtrl:DMSO vs. siPiezo:DMSO	0.0731	-0.3730 to 0.5192	No	ns	0.9507
						siCtrl:Yoda1 vs. siPiezo:Yoda1	0.6444	0.1983 to 1.091	Yes	**	0.0074
						siPiezo:DMSO vs. siPiezo:Yoda1	-0.1566	-0.6028 to 0.2895	No	ns	0.686

## Sheet: Fig 3-c
		Hey1 expression (normalized to GAPDH expression - relative to siCtrl DMSO)				Statistical analysis
siCtrl	DMSO	0.950932	1.03341	1.01566		2-way Anova
	Yoda	3.68691	4.43033	2.08842
siPiezo	DMSO	1.26349	1.02627	1.31714		Tukey's multiple comparisons test	Mean Diff.	95.00% CI of diff.	Significant?	Summary	Adjusted P Value
	Yoda	1.53945	1.49217	1.34017		siCtrl:DMSO vs. siCtrl:Yoda1	-2.402	-3.986 to -0.8175	Yes	**	0.0055
						siCtrl:DMSO vs. siPiezo:DMSO	-0.2023	-1.787 to 1.382	No	ns	0.9754
						siCtrl:Yoda1 vs. siPiezo:Yoda1	1.945	0.3602 to 3.529	Yes	*	0.0183
						siPiezo:DMSO vs. siPiezo:Yoda1	-0.255	-1.839 to 1.329	No	ns	0.9531

## Sheet: Fig 3-d
		HES1 expression (normalized to GAPDH expression - relative to siCtrl DMSO)				Statistical analysis
DMSO	DMSO	1.07042	1.14327	0.78631		2-way Anova
	Yoda	2.43373	3.16712	3.30161
DAPT	DMSO	0.46593	1.21266	1.03038		Tukey's multiple comparisons test	Mean Diff.	95.00% CI of diff.	Significant?	Summary	Adjusted P Value
	Yoda	1.81903	2.17825	1.55097		DMSO:DMSO vs. DMSO:Yoda1	-1.967	-2.896 to -1.039	Yes	***	0.0006
						DMSO:DMSO vs. DAPT:DMSO	0.09701	-0.8315 to 1.026	No	ns	0.9861
						DMSO:Yoda1 vs. DAPT:Yoda1	1.118	0.1896 to 2.047	Yes	*	0.0202
						DAPT:DMSO vs. DAPT:Yoda1	-0.9464	-1.875 to -0.01793	Yes	*	0.0458

## Sheet: Fig 3-e
		DLL4 expression (normalized to GAPDH expression - relative to siCtrl DMSO)				Statistical analysis
DMSO	DMSO	1.15236	1.12085	0.72678		2-way Anova
	Yoda	1.63535	2.49596	2.75986
DAPT	DMSO	0.33208	0.36339	0.98255		Tukey's multiple comparisons test	Mean Diff.	95.00% CI of diff.	Significant?	Summary	Adjusted P Value
	Yoda	0.98938	0.70691	0.5302		DMSO:DMSO vs. DMSO:Yoda1	-1.297	-2.301 to -0.2926	Yes	*	0.0139
						DMSO:DMSO vs. DAPT:DMSO	0.4407	-0.5638 to 1.445	No	ns	0.5302
						DMSO:Yoda1 vs. DAPT:Yoda1	1.555	0.5505 to 2.559	Yes	**	0.0049
						DAPT:DMSO vs. DAPT:Yoda1	-0.1828	-1.187 to 0.8216	No	ns	0.9345

## Sheet: Fig 3-f
		DLL4 expression (normalized to GAPDH expression - relative to siCtrl DMSO)				Statistical analysis
DMSO	DMSO	1.1687	1.09422	0.737084		2-way Anova
	Yoda	6.14708	6.18984	7.51567
DAPT	DMSO	0.907457	1.02094	0.711976		Tukey's multiple comparisons test	Mean Diff.	95.00% CI of diff.	Significant?	Summary	Adjusted P Value
	Yoda	3.04175	3.86348	2.86771		DMSO:DMSO vs. DMSO:Yoda1	-5.618	-6.902 to -4.333	Yes	****	<0.0001
						DMSO:DMSO vs. DAPT:DMSO	0.1199	-1.165 to 1.405	No	ns	0.99
						DMSO:Yoda1 vs. DAPT:Yoda1	3.36	2.075 to 4.645	Yes	***	0.0001
						DAPT:DMSO vs. DAPT:Yoda1	-2.378	-3.662 to -1.093	Yes	**	0.0016

## Sheet: Fig 3-g
		HES1 expression (normalized to GAPDH expression - relative to siCtrl DMSO)				Statistical analysis
siCtrl	DMSO	1.03426	1.02712	0.93861		2-way Anova
	Yoda	8.81524	15.8345	8.13984
siADAM10	DMSO	0.63949	1.54756	5.6962		Tukey's multiple comparisons test	Mean Diff.	95.00% CI of diff.	Significant?	Summary	Adjusted P Value
	Yoda	1.07923	10.9663	5.40764		siCtrl:DMSO vs. siCtrl:Yoda1	-9.93	-19.17 to -0.6863	Yes	*	0.0358
						siCtrl:DMSO vs. siADAM10:DMSO	-1.628	-10.87 to 7.616	No	ns	0.94
						siCtrl:Yoda1 vs. siADAM10:Yoda1	5.112	-4.131 to 14.36	No	ns	0.3519
						siADAM10:DMSO vs. siADAM10:Yoda1	-3.19	-12.43 to 6.054	No	ns	0.6966

## Sheet: Fig 3-h
		DLL4 expression (normalized to GAPDH expression - relative to siCtrl DMSO)				Statistical analysis
siCtrl	DMSO	1.24311	0.83738	0.91952		2-way Anova
	Yoda	2.14199	3.26923	2.53845
siADAM10	DMSO	0.293	0.40724	0.68489		Tukey's multiple comparisons test	Mean Diff.	95.00% CI of diff.	Significant?	Summary	Adjusted P Value
	Yoda	0.17726	0.84907	0.75731		siCtrl:DMSO vs. siCtrl:Yoda1	-1.65	-2.616 to -0.6836	Yes	**	0.0027
						siCtrl:DMSO vs. siADAM10:DMSO	0.5383	-0.4280 to 1.505	No	ns	0.3464
						siCtrl:Yoda1 vs. siADAM10:Yoda1	2.055	1.089 to 3.022	Yes	***	0.0006
						siADAM10:DMSO vs. siADAM10:Yoda1	-0.1328	-1.099 to 0.8335	No	ns	0.9697

## Sheet: Fig 3-i
		Hey1 expression (normalized to GAPDH expression - relative to siCtrl DMSO)				Statistical analysis
siCtrl	DMSO	1.59191	0.286332	1.12176		2-way Anova
	Yoda	3.30754	4.87621	3.91975
siADAM10	DMSO	1.23607	0.651014	2.69589		Tukey's multiple comparisons test	Mean Diff.	95.00% CI of diff.	Significant?	Summary	Adjusted P Value
	Yoda	0.551243	1.31564	1.48531		siCtrl:DMSO vs. siCtrl:Yoda1	-3.034	-5.068 to -1.001	Yes	**	0.0061
						siCtrl:DMSO vs. siADAM10:DMSO	-0.5277	-2.561 to 1.506	No	ns	0.8385
						siCtrl:Yoda1 vs. siADAM10:Yoda1	2.917	0.8837 to 4.950	Yes	**	0.0077
						siADAM10:DMSO vs. siADAM10:Yoda1	0.4103	-1.623 to 2.444	No	ns	0.914

## Sheet: Fig 3-j
		HES1 expression (normalized to GAPDH expression - relative to siCtrl DMSO)				Statistical analysis
DMSO	DMSO	1.07042	1.14327	0.78631		2-way Anova
	Yoda	2.43373	3.16712	3.30161
GI	DMSO	1.41733	2.53708	1.39298		Tukey's multiple comparisons test	Mean Diff.	95.00% CI of diff.	Significant?	Summary	Adjusted P Value
	Yoda	0.88158	1.06302	0.85155		DMSO:DMSO vs. DMSO:Yoda1	-1.967	-3.057 to -0.8783	Yes	**	0.0018
						DMSO:DMSO vs. GI:DMSO	-0.7825	-1.872 to 0.3067	No	ns	0.177
						DMSO:Yoda1 vs. GI:Yoda1	2.035	0.9463 to 3.125	Yes	**	0.0015
						GI:DMSO vs. GI:Yoda1	0.8504	-0.2388 to 1.940	No	ns	0.1344

[truncated: 2 more sheets: fig 3-k, Fig 3-l]
