# Supplementary material for: Shear stress activates ADAM10 sheddase to regulate Notch1 via the Piezo1 force sensor in endothelial cells
Source: eLife. 2020 Jun 2;9:e50684. doi: 10.7554/eLife.50684 (PMC7295575; doi:10.7554/eLife.50684)
Supplement: Figure 4—figure supplement 1—source data 1. [file elife-50684-fig4-figsupp1-data1.xlsx]

## Sheet: FigS5-a
		HES2 expression (normalized to GAPDH expression - relative to siCtrl Static)				Statistical analysis
siCtrl	Static	1.31952	0.747433	0.933044		2-way Anova
	Shear	1.56374	2.14355	1.31951
siPiezo	Static	0.790041	0.396392	0.526681		Tukey's multiple comparisons test	Mean Diff.	95.00% CI of diff.	Significant?	Summary	Adjusted P Value
	Shear	0.690159	0.277392	0.817902		siCtrl:Static vs. siCtrl:Shear	-0.6758	-1,487 to 0,1352	No	ns	0.1062
						siCtrl:Static vs. siPiezo:Static	0.429	-0,3820 to 1,240	No	ns	0.3858
						siCtrl:Shear vs. siPiezo:Shear	1.081	0,2697 to 1,892	No	ns	0.0501
						siPiezo:Static vs. siPiezo:Shear	-0.02411	-0,8351 to 0,7869	No	ns	0.9997

## Sheet: FigS5-b
		HEY2 expression (normalized to GAPDH expression - relative to siCtrl Static)				Statistical analysis
siCtrl	Static	0.697597	1.16915	1.13325		2-way Anova
	Shear	0.590496	0.837987	1.01045
siPiezo	Static	0.458502	0.806642	0.50874		Tukey's multiple comparisons test	Mean Diff.	95.00% CI of diff.	Significant?	Summary	Adjusted P Value
	Shear	0.442884	0.655197	0.809442		siCtrl:Static vs. siCtrl:Shear	0.1873	-0,3716 to 0,7461	No	ns	0.7143
						siCtrl:Static vs. siPiezo:Static	0.4088	-0,1500 to 0,9676	No	ns	0.1671
						siCtrl:Shear vs. siPiezo:Shear	0.177	-0,3819 to 0,7358	No	ns	0.7463
						siPiezo:Static vs. siPiezo:Shear	-0.04455	-0,6034 to 0,5143	No	ns	0.9937

## Sheet: FigS5-c
		Jagged1 expression (normalized to GAPDH expression - relative to siCtrl Static)				Statistical analysis
siCtrl	Static	0.959845	1.08363	0.956524		2-way Anova
	Shear	0.891929	1.03526	0.946058
siPiezo	Static	0.803851	1.31951	1.1607		Tukey's multiple comparisons test	Mean Diff.	95.00% CI of diff.	Significant?	Summary	Adjusted P Value
	Shear	0.873573	1.09051	1.07923		siCtrl:Static vs. siCtrl:Shear	0.04249	-0,3608 to 0,4457	No	ns	0.9858
						siCtrl:Static vs. siPiezo:Static	-0.09451	-0,4978 to 0,3087	No	ns	0.874
						siCtrl:Shear vs. siPiezo:Shear	-0.05675	-0,4600 to 0,3465	No	ns	0.9676
						siPiezo:Static vs. siPiezo:Shear	0.08025	-0,3230 to 0,4835	No	ns	0.917

## Sheet: FigS5-d
		Piezo1 expression (normalized to GAPDH expression - relative to siCtrl Static)				Statistical analysis
siCtrl	Static	0.971961	0.736609	1.29143		2-way Anova
	Shear	1.04972	1.39959	0.986233
siPiezo	Static	0.194791	0.120324	0.149685		Tukey's multiple comparisons test	Mean Diff.	95.00% CI of diff.	Significant?	Summary	Adjusted P Value
	Shear	0.190782	0.0967228	0.145088		siCtrl:Static vs. siCtrl:Shear	-0.1453	-0,6179 to 0,3274	No	ns	0.7622
						siCtrl:Static vs. siPiezo:Static	0.8451	0,3725 to 1,318	Yes	**	0.002
						siCtrl:Shear vs. siPiezo:Shear	1.001	0,5285 to 1,474	Yes	***	0.0006
						siPiezo:Static vs. siPiezo:Shear	0.01074	-0,4619 to 0,4834	No	ns	0.9998
