# Supplementary material for: Shear stress activates ADAM10 sheddase to regulate Notch1 via the Piezo1 force sensor in endothelial cells
Source: eLife. 2020 Jun 2;9:e50684. doi: 10.7554/eLife.50684 (PMC7295575; doi:10.7554/eLife.50684)
Supplement: Figure 4—figure supplement 2—source data 1. [file elife-50684-fig4-figsupp2-data1.xlsx]

## Sheet: FigS6-a
	Piezo1 mRNA expression (normalized to Bact and relative to Ctrl Mice)				Statistical analysis
	Ctrl Mice	Piezo1ΔEC Mice
	1.20544	0.21769			Unpaired t test
	0.88707	0.2449			P value	<0.0001
	0.97687	0.27211			P value summary	****
	0.93061	0.21769			Significantly different (P < 0.05)?	Yes
	1.15302	0.19048			One- or two-tailed P value?	Two-tailed
	0.84698	0.27211			t, df	t=13.77, df=14
		0.16327			How big is the difference?
		0.16327			Mean of column A (Ctrl )	1
		0.01239			Mean of column B (Piezo1 DEC)	0.1767
		0.01304			Difference between means (B - A) ± SEM	-0.8233 ± 0.05979
					95% confidence interval	-0.9515 to -0.6951
	0.999998	0.194879			R squared (eta squared)	0.9312

## Sheet: FigS6-b
	Tie2 mRNA expression (normalized to Bact and relative to Ctrl Mice)				Statistical analysis
	Ctrl Mice	Piezo1ΔEC Mice
	0.48282	0.84064			Unpaired t test
	1.11308	1.31454			P value	0.4608
	0.91673	0.95235			P value summary	ns
	1.68128	0.85534			Significantly different (P < 0.05)?	No
	1.20127	0.80361			One- or two-tailed P value?	Two-tailed
	0.60481	0.33788			t, df	t=0.7600, df=13
		0.99279			How big is the difference?
		1.03495			Mean of column A (Ctrl )	1
		0.62614			Mean of column B (Piezo1 DEC)	0.862
					Difference between means (B - A) ± SEM	-0.1380 ± 0.1815
	0.999998	0.862027			95% confidence interval	-0.5301 to 0.2542
					R squared (eta squared)	0.04255

## Sheet: FigS6-c
	Bact CT Value				Statistical analysis
	Ctrl Mice	Piezo1ΔEC Mice
	20.035	20.67			Unpaired t test
	20.57	21.025			P value	0.1828
	20.15	20.45			P value summary	ns
	23.14	20.325			Significantly different (P < 0.05)?	No
	23.12	21.71			One- or two-tailed P value?	Two-tailed
	20.125	21.015			t, df	t=1.407, df=13
		18.515			How big is the difference?
		18.245			Mean of column A (Ctrl )	21.19
		20.06			Mean of column B (Piezo1 DEC)	20.22
					Difference between means (B - A) ± SEM	-0.9661 ± 0.6866
	21.19	20.2239			95% confidence interval	-2.449 to 0.5172
					R squared (eta squared)	0.1322
