# Supplementary material for: Shear stress activates ADAM10 sheddase to regulate Notch1 via the Piezo1 force sensor in endothelial cells
Source: eLife. 2020 Jun 2;9:e50684. doi: 10.7554/eLife.50684 (PMC7295575; doi:10.7554/eLife.50684)
Supplement: Figure 4—source data 1. [file elife-50684-fig4-data1.xlsx]

## Sheet: Fig 4-a
		HES1 expression (normalized to GAPDH expression - relative to siCtrl Static)				Statistical analysis
siCtrl	Static	1.89432	0.43128	0.6744		2-way Anova
	Shear	4.70763	5.9794	4.45369
siPiezo	Static	0.41037	0.56644	0.35355		Tukey's multiple comparisons test	Mean Diff.	95.00% CI of diff.	Significant?	Summary	Adjusted P Value
	Shear	1.82134	1.64148	1.23971		siCtrl:Static vs. siCtrl:Shear	-4.047	-5.585 to -2.509	Yes	***	0.0001
						siCtrl:Static vs. siPiezo1:Static	0.5565	-0.9813 to 2.094	No	ns	0.6667
						siCtrl:Shear vs. siPiezo1:Shear	3.479	1.942 to 5.017	Yes	***	0.0004
						siPiezo1:Static vs. siPiezo1:Shear	-1.124	-2.662 to 0.4138	No	ns	0.1675

## Sheet: Fig 4-b
		DLL4 expression (normalized to GAPDH expression - relative to siCtrl Static)				Statistical analysis
siCtrl	Static	0.61932	1.49874	0.88194		2-way Anova
	Shear	2.75108	3.5186	2.15846
siPiezo	Static	0.90752	1.54221	0.61557		Tukey's multiple comparisons test	Mean Diff.	95.00% CI of diff.	Significant?	Summary	Adjusted P Value
	Shear	1.43893	1.69937	1.41421		siCtrl:Static vs. siCtrl:Shear	-1.809	-3.062 to -0.5566	Yes	**	0.0074
						siCtrl:Static vs. siPiezo1:Static	-0.02177	-1.275 to 1.231	No	ns	>0.9999
						siCtrl:Shear vs. siPiezo1:Shear	1.292	0.03909 to 2.545	Yes	*	0.0435
						siPiezo1:Static vs. siPiezo1:Shear	-0.4957	-1.749 to 0.7570	No	ns	0.606

## Sheet: Fig 4-c
		Hey1 expression (normalized to GAPDH expression - relative to siCtrl Static)				Statistical analysis
siCtrl	Static	1.005	1.17869	0.81631		2-way Anova
	Shear	1.80876	1.36604	1.5966
siPiezo	Static	1.13288	0.89503	0.79278		Tukey's multiple comparisons test	Mean Diff.	95.00% CI of diff.	Significant?	Summary	Adjusted P Value
	Shear	0.77916	0.84968	1.21841		siCtrl:Static vs. siCtrl:Shear	-0.5905	-1.126 to -0.05465	Yes	*	0.0317
						siCtrl:Static vs. siPiezo1:Static	0.05977	-0.4760 to 0.5956	No	ns	0.9833
						siCtrl:Shear vs. siPiezo1:Shear	0.6414	0.1056 to 1.177	Yes	*	0.0209
						siPiezo1:Static vs. siPiezo1:Shear	-0.008853	-0.5447 to 0.5270	No	ns	>0.9999

## Sheet: Fig 4-d
	HES1 mRNA expression (normalized to Bact and relative to Ctrl Mice)				Statistical analysis
	Ctrl Mice	Piezo1ΔEC Mice
	0.61807	0.56678			Unpaired t test
	1.74213	0.84139			P value	0.0044
	1.19819	0.48493			P value summary	**
	0.44161	0.43856			Significantly different (P < 0.05)?	Yes
	0.73446	0.22545			One- or two-tailed P value?	Two-tailed
	1.26554	0.18567			t, df	t=3.435, df=13
		0.02751			How big is the difference?
		0.09023			Mean of column A (Ctrl )	1
		0.15494			Mean of column B (Piezo1 DEC)	0.3351
					Difference between means (B - A) ± SEM	-0.6649 ± 0.1936
	1	0.335051			95% confidence interval	-1.083 to -0.2468
					R squared (eta squared)	0.4759
					F test to compare variances
					F, DFn, Dfd	3.369, 5, 8
					P value	0.1243
					P value summary	ns
					Significantly different (P < 0.05)?	No

## Sheet: Fig 4-e
	DLL4 mRNA expression (normalized to Bact and relative to Ctrl Mice)				Statistical analysis
	Ctrl Mice	Piezo1ΔEC Mice
	1.51266	0.45599			Unpaired t test
	1.30323	0.61433			P value	0.0435
	0.76159	0.26648			P value summary	*
	0.42252	0.37555			Significantly different (P < 0.05)?	Yes
	1.0933	0.66993			One- or two-tailed P value?	Two-tailed
	0.9067	1.23721			t, df	t=2.237, df=13
		0.88398			How big is the difference?
		0.57383			Mean of column A (Ctrl )	1
		0.04619			Mean of column B (Piezo1 DEC)	0.5693
					Difference between means (B - A) ± SEM	-0.4307 ± 0.1926
	1	0.569277			95% confidence interval	-0.8467 to -0.01470
					R squared (eta squared)	0.2779
					F test to compare variances
					F, DFn, Dfd	1.254, 5, 8
					P value	0.7376
					P value summary	ns
					Significantly different (P < 0.05)?	No

## Sheet: Fig 4-f
	Hey1 mRNA expression (normalized to Bact and relative to Ctrl Mice)				Statistical analysis
	Ctrl Mice	Piezo1ΔEC Mice
	0.3547	0.01745			Unpaired t test
	1.80208	0.05891			P value	0.0002
	1.42866	0.02134			P value summary	***
	0.41456	0.01628			Significantly different (P < 0.05)?	Yes
	1.11387	0.06559			One- or two-tailed P value?	Two-tailed
	0.88613	0.1737			t, df	t=5.097, df=13
		0.04068			How big is the difference?
		0.03105			Mean of column A (Ctrl )	1
		0.00592			Mean of column B (Piezo1 DEC)	0.04788
					Difference between means (B - A) ± SEM	-0.9521 ± 0.1868
	1	0.04788			95% confidence interval	-1.356 to -0.5485
					R squared (eta squared)	0.6665
					F test to compare variances
					F, DFn, Dfd	122.9, 5, 8
					P value	<0.0001
					P value summary	****
					Significantly different (P < 0.05)?	Yes

## Sheet: Fig 4-g
	EphrinB2 mRNA expression (normalized to Bact and relative to Ctrl Mice)				Statistical analysis
	Ctrl Mice	Piezo1ΔEC Mice
	1.4491	0.61992			Unpaired t test
	1.07935	0.76586			P value	0.0288
	1.00011	0.42489			P value summary	*
	0.47144	0.46495			Significantly different (P < 0.05)?	Yes
	1.21328	0.61778			One- or two-tailed P value?	Two-tailed
	0.78672	0.9171			t, df	t=2.458, df=13
		0.61778			How big is the difference?
		0.99665			Mean of column A (Ctrl )	1
		0.12023			Mean of column B (Piezo1 DEC)	0.6161
					Difference between means (B - A) ± SEM	-0.3839 ± 0.1562
	1	0.616129			95% confidence interval	-0.7213 to -0.04647
					R squared (eta squared)	0.3173
					F test to compare variances
					F, DFn, Dfd	1.643, 5, 8
					P value	0.5068
					P value summary	ns
					Significantly different (P < 0.05)?	No

## Sheet: Fig 4-h
	HeyL mRNA expression (normalized to Bact and relative to Ctrl Mice)				Statistical analysis
	Ctrl Mice	Piezo1ΔEC Mice
	0.36524	0.00107			Unpaired t test
	0.04613	0.00796			P value	0.0389
	1.08066	0.000884354			P value summary	*
	0.00275	0.00228			Significantly different? (P < 0.05)	Yes
					One- or two-tailed P value?	Two-tailed
		0.00317			t, df	t=2,318 df=12
	3.02495	0.00214			How big is the difference?
		0.00117			Mean ± SEM of column A	1,000 ± 0,4304, n=7
	2.03061				Mean ± SEM of column B	0,002571 ± 0,0009476, n=7
	0.44966				Difference between means	-0,9976 ± 0,4304
					95% confidence interval	-1,935 to -0,05982
	1	0.00266776			R squared	0.3092
	7	7

## Sheet: Fig 4-i
	Jagged1 mRNA expression (normalized to Bact and relative to Ctrl Mice)				Statistical analysis
	Ctrl Mice	Piezo1ΔEC Mice
	0.366702	0.140406			Unpaired t test
	0.0831973	0.0975768			P value	0.0389
	1.14685	0.0646001			P value summary	*
	0.116442	0.111698			Significantly different? (P < 0.05)	Yes
	0.0787095	0.0702032			One- or two-tailed P value?	Two-tailed
		0.137517			t, df	t=2,318 df=12
	2.87325	0.0623996			How big is the difference?
		0.0840669			Mean ± SEM of column A	1,000 ± 0,4304, n=7
	2.66231				Mean ± SEM of column B	0,002571 ± 0,0009476, n=7
	0.672535	0.0590336			Difference between means	-0,9976 ± 0,4304
					95% confidence interval	-1,935 to -0,05982
	1	0.0960586			R squared	0.3092

## Sheet: Fig 4-j
	Hes2 mRNA expression (number of mice)				Statistical analysis
	Ctrl Mice	Piezo1ΔEC Mice
Expression	5	1			Fisher's exact test
No detectable expression	3	9			P value	0.043
					P value summary	*
					One- or two-tailed	Two-tailed
					Significantly different? (alpha < 0.05)	Yes

[truncated: 1 more sheets: Fig 4-k]
